# Supplementary material for: Two Synthetic Peptides Corresponding to the Human Follicle-Stimulating Hormone β-Subunit Promoted Reproductive Functions in Mice
Source: MDPI journal article supplement (doi:10.3390/ijms231911735), 2022-10-03
Supplement: s1 [file s1]

## Supplemental files:

**Supplementary Table S1.** Amino acid sequence of FSH $\beta$ 13AA/SH $\beta$ 16AA and their scrambled control peptides

| Peptide                        | Sequence         | Peptide mass percentage (%) |
|--------------------------------|------------------|-----------------------------|
| FSH $\beta$ 13AA               | LVYKDPARPKIQK    | 100                         |
| Scrambled FSH $\beta$ 13AA mix | VYAKPLQKDPKIR    | 25                          |
|                                | DYRKAQPPKLKIV    | 25                          |
|                                | PADKKKLIRYPVQ    | 25                          |
|                                | RLAVIKQPKYKPD    | 25                          |
|                                | TRDLVYKDPARPKIQK | 100                         |
| FSH $\beta$ 16AA               | TRDLVYKDPARPKIQK | 100                         |
| Scrambled FSH $\beta$ 16AA mix | KILDPRKPTYDVKAQR | 25                          |
|                                | KRQKPVYKRLTDDAIP | 25                          |
|                                | PDKQLTYPVRKAIDRK | 25                          |
|                                | YPLVKPRQTKIDKDRA | 25                          |
|                                | TRDLVYKDPARPKIQK | 100                         |

The mixed scrambled peptide for FSH $\beta$ 13AA and FSH $\beta$ 16AA were generated at Mimotopes website (<http://www.mimotopes.com>).

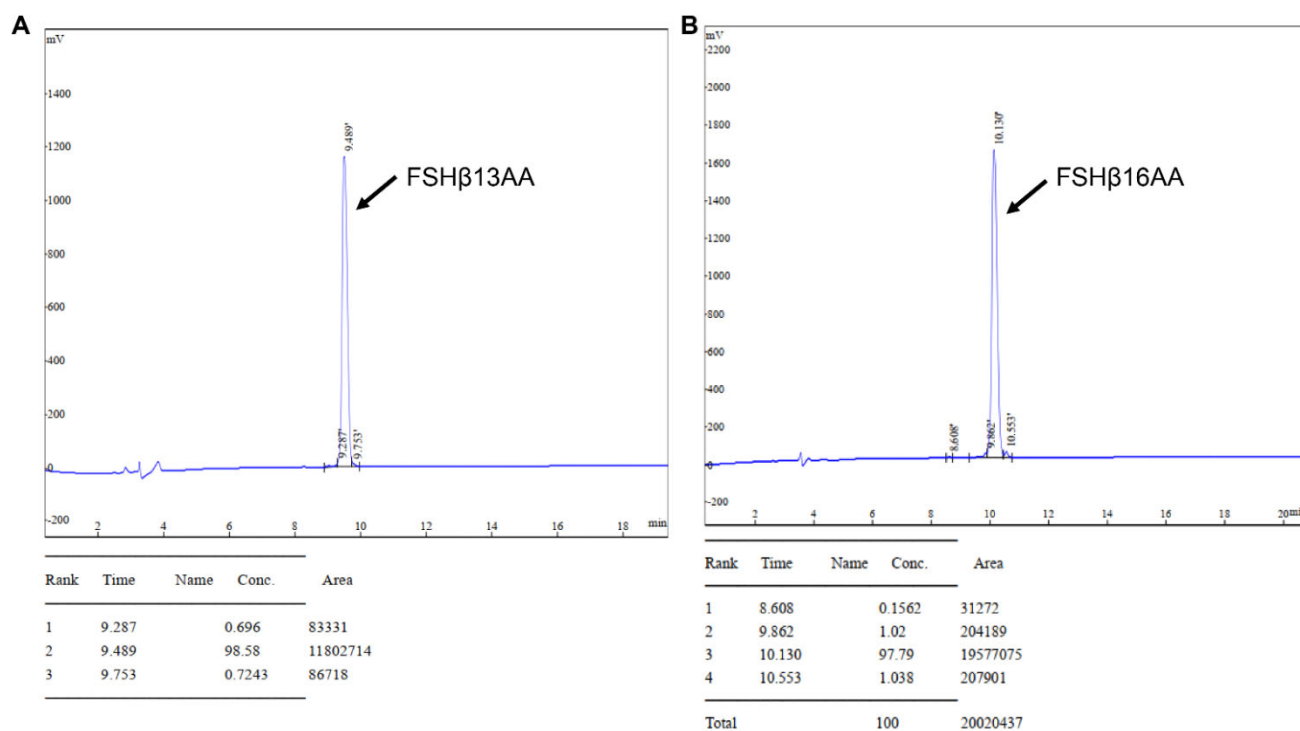

**Supplementary Figure S1.** High-performance liquid chromatography (HPLC) purification of FSH $\beta$ 13AA and FSH $\beta$ 16AA peptides. According to peak areas, the purity of FSH $\beta$ 13AA and FSH $\beta$ 16AA was equal to 98.58 and 97.79%, respectively.
